# Supplementary material for: The R10Pd21 compounds (R = Y, Pr, Nd, Sm, Gd–Lu). Crystal structure and magnetism of the ‘RPd2’ phases
Source: Royal Society of Chemistry journal article supplement (doi:10.1039/c8tc00160j), 2018-01-01
Supplement: c8tc00160j1.pdf [file c8tc00160j1.pdf]

# The $R_{10}Pd_{21}$ compounds ( $R = Y, Pr, Nd, Sm, Gd-Lu$ ).

## Crystal structure and magnetism of the ' $RPd_2$ ' phases<sup>§</sup>

Pietro Manfrinetti,<sup>ab\*</sup> Alessia Provino,<sup>ab</sup> Nediadath S. Sangeetha<sup>c‡</sup>, Sudesh K. Dhar<sup>c</sup>

<sup>a</sup> *Department of Chemistry, University of Genova, Via Dodecaneso 31, 16146 Genova, Italy*

<sup>b</sup> *Institute SPIN-CNR, Corso Perrone 24, 16152 Genova, Italy*

<sup>c</sup> *Condensed Matter Physics & Material Science, Tata Institute of Fundamental Research, Homi Bhabha Road, Mumbai 400 005, India*

<sup>§</sup> Dedicated to the memory of Prof. Karl Gschneidner, Jr.

### Electronic Supplementary Information (ESI) available

Supplementary Information contains the Tables of the Rietveld refinement data for the  $Nd_{10}Pd_{21}$  (**Table S1**),  $Tb_{10}Pd_{21}$  (**Table S2**) and  $Lu_{10}Pd_{21}$  (**Table S3**) compounds, the Figures showing: the SEM microphotograph of four samples prepared at the compositions  $Sc_{35}Pd_{65}$ ,  $Pr_{10}Pd_{21}$ ,  $Nd_{10}Pd_{21}$  and  $Gd_{10}Pd_{21}$  (**Fig. S1**), the trend of the volume contraction vs. the  $R^{3+}$  ionic radius for the  $R_{10}Pd_{21}$  compounds (**Fig. S2**), the Rietveld refinement profile for the  $Nd_{10}Pd_{21}$  (**Fig. S3**),  $Tb_{10}Pd_{21}$  (**Fig. S4**) and  $Lu_{10}Pd_{21}$  (**Fig. S5**) compounds.

**Table S1** Rietveld refinement data, with standardized atomic positions, for the Nd<sub>10</sub>Pd<sub>21</sub> compound.

| Atom | Wyckoff site | Atomic coordinates |          |           | Occupation |
|------|--------------|--------------------|----------|-----------|------------|
|      |              | <i>x</i>           | <i>y</i> | <i>z</i>  |            |
| Nd1  | 4 <i>i</i>   | 0.6496(7)          | 0        | 0.021(1)  | 1          |
| Nd2  | 4 <i>i</i>   | 0.8538(7)          | 0        | 0.1459(9) | 1          |
| Nd3  | 4 <i>i</i>   | 0.6839(7)          | 0        | 0.300(1)  | 1          |
| Nd4  | 4 <i>i</i>   | 0.0727(7)          | 0        | 0.3102(9) | 1          |
| Nd5  | 4 <i>i</i>   | 0.1197(6)          | 0        | 0.6317(8) | 1          |
| Nd6  | 4 <i>i</i>   | 0.2776(8)          | 0        | 0.425(1)  | 1          |
| Nd7  | 4 <i>i</i>   | 0.4303(8)          | 0        | 0.513(1)  | 1          |
| Nd8  | 4 <i>i</i>   | 0.0451(7)          | 0        | 0.090(1)  | 1          |
| Nd9  | 4 <i>i</i>   | 0.4629(9)          | 0        | 0.222(1)  | 1          |
| Nd10 | 4 <i>i</i>   | 0.2372(8)          | 0        | 0.148(1)  | 1          |
| Pd1  | 4 <i>i</i>   | 0.148(1)           | 0        | 0.026(1)  | 1          |
| Pd2  | 4 <i>i</i>   | 0.3559(8)          | 0        | 0.166(1)  | 1          |
| Pd3  | 4 <i>i</i>   | 0.1836(9)          | 0        | 0.302(1)  | 1          |
| Pd4  | 4 <i>i</i>   | 0.5626(8)          | 0        | 0.290(1)  | 1          |
| Pd5  | 4 <i>i</i>   | 0.3825(8)          | 0        | 0.334(1)  | 1          |
| Pd6  | 4 <i>i</i>   | 0.2272(9)          | 0        | 0.582(1)  | 1          |
| Pd7  | 4 <i>i</i>   | 0.0648(9)          | 0        | 0.475(1)  | 1          |
| Pd8  | 4 <i>i</i>   | 0.5382(8)          | 0        | 0.095(1)  | 1          |
| Pd9  | 4 <i>i</i>   | 0.036(1)           | 0        | 0.775(1)  | 1          |
| Pd10 | 4 <i>i</i>   | 0.734(1)           | 0        | 0.144(1)  | 1          |
| Pd11 | 4 <i>e</i>   | 1/4                | 1/4      | 0         | 1          |
| Pd12 | 8 <i>j</i>   | 0.2998(4)          | 0.246(4) | 0.2776(7) | 1          |
| Pd13 | 8 <i>j</i>   | 0.1297(4)          | 0.271(3) | 0.1761(6) | 1          |
| Pd14 | 8 <i>j</i>   | 0.1658(3)          | 0.212(2) | 0.4552(6) | 1          |
| Pd15 | 8 <i>j</i>   | 0.4437(4)          | 0.254(4) | 0.0657(6) | 1          |
| Pd16 | 8 <i>j</i>   | 0.4839(4)          | 0.247(3) | 0.3850(6) | 1          |

$$a = 25.0991(6) \text{ \AA}, b = 5.7929(1) \text{ \AA}, c = 16.6395(2) \text{ \AA}, \beta = 90.7840(4)^\circ$$

$$R_B = 1.2 \%, R_F = 1.1 \%, R_{wp} = 11.5 \%, \chi^2 = 0.7, B_{over} = 0.428(2) \text{ \AA}^2$$

**Table S2** Rietveld refinement data, with standardized atomic positions, for the Tb<sub>10</sub>Pd<sub>21</sub> compound.

| Atom | Wyckoff site | Atomic coordinates |          |           | Occupation |
|------|--------------|--------------------|----------|-----------|------------|
|      |              | <i>x</i>           | <i>y</i> | <i>z</i>  |            |
| Tb1  | 4 <i>i</i>   | 0.6470(6)          | 0        | 0.0208(8) | 1          |
| Tb2  | 4 <i>i</i>   | 0.8545(6)          | 0        | 0.1509(9) | 1          |
| Tb3  | 4 <i>i</i>   | 0.6872(5)          | 0        | 0.3072(8) | 1          |
| Tb4  | 4 <i>i</i>   | 0.0762(5)          | 0        | 0.3150(7) | 1          |
| Tb5  | 4 <i>i</i>   | 0.1182(5)          | 0        | 0.6317(7) | 1          |
| Tb6  | 4 <i>i</i>   | 0.2770(6)          | 0        | 0.4227(8) | 1          |
| Tb7  | 4 <i>i</i>   | 0.4313(7)          | 0        | 0.5200(9) | 1          |
| Tb8  | 4 <i>i</i>   | 0.0422(6)          | 0        | 0.0931(8) | 1          |
| Tb9  | 4 <i>i</i>   | 0.4695(5)          | 0        | 0.2219(8) | 1          |
| Tb10 | 4 <i>i</i>   | 0.2369(6)          | 0        | 0.1469(9) | 1          |
| Pd1  | 4 <i>i</i>   | 0.1487(7)          | 0        | 0.022(1)  | 1          |
| Pd2  | 4 <i>i</i>   | 0.3576(7)          | 0        | 0.160(1)  | 1          |
| Pd3  | 4 <i>i</i>   | 0.1882(6)          | 0        | 0.2959(9) | 1          |
| Pd4  | 4 <i>i</i>   | 0.5665(6)          | 0        | 0.2926(8) | 1          |
| Pd5  | 4 <i>i</i>   | 0.3838(6)          | 0        | 0.3368(9) | 1          |
| Pd6  | 4 <i>i</i>   | 0.2328(7)          | 0        | 0.579(1)  | 1          |
| Pd7  | 4 <i>i</i>   | 0.0638(7)          | 0        | 0.482(1)  | 1          |
| Pd8  | 4 <i>i</i>   | 0.5431(7)          | 0        | 0.0946(9) | 1          |
| Pd9  | 4 <i>i</i>   | 0.0389(7)          | 0        | 0.773(1)  | 1          |
| Pd10 | 4 <i>i</i>   | 0.7400(8)          | 0        | 0.147(1)  | 1          |
| Pd11 | 4 <i>e</i>   | 1/4                | 1/4      | 0         | 1          |
| Pd12 | 8 <i>j</i>   | 0.2950(3)          | 0.256(3) | 0.2724(6) | 1          |
| Pd13 | 8 <i>j</i>   | 0.1283(3)          | 0.256(3) | 0.1759(5) | 1          |
| Pd14 | 8 <i>j</i>   | 0.1653(2)          | 0.229(2) | 0.4529(4) | 1          |
| Pd15 | 8 <i>j</i>   | 0.4415(3)          | 0.244(3) | 0.0606(5) | 1          |
| Pd16 | 8 <i>j</i>   | 0.4837(3)          | 0.252(2) | 0.3837(4) | 1          |

$$a = 24.5611(6) \text{ \AA}, b = 5.7339(1) \text{ \AA}, c = 16.3784(4) \text{ \AA}, \beta = 91.1349(2)^\circ$$

$$R_B = 1.5 \%, R_F = 1.5 \%, R_{wp} = 8.6 \%, \chi^2 = 0.8, B_{over} = 2.00(2) \text{ \AA}^2$$

**Table S3** Rietveld refinement data, with standardized atomic positions, for the Lu<sub>10</sub>Pd<sub>21</sub> compound; a small amount of Lu<sub>3</sub>Pd<sub>5</sub> phase is also present in the sample.

| Atom | Wyckoff site | Atomic coordinates |          |           | Occupation |
|------|--------------|--------------------|----------|-----------|------------|
|      |              | <i>x</i>           | <i>y</i> | <i>z</i>  |            |
| Lu1  | 4 <i>i</i>   | 0.6478(4)          | 0        | 0.0176(5) | 1          |
| Lu2  | 4 <i>i</i>   | 0.8537(4)          | 0        | 0.1383(5) | 1          |
| Lu3  | 4 <i>i</i>   | 0.6906(4)          | 0        | 0.3043(7) | 1          |
| Lu4  | 4 <i>i</i>   | 0.0779(4)          | 0        | 0.3111(6) | 1          |
| Lu5  | 4 <i>i</i>   | 0.1182(4)          | 0        | 0.6362(6) | 1          |
| Lu6  | 4 <i>i</i>   | 0.2776(4)          | 0        | 0.4208(6) | 1          |
| Lu7  | 4 <i>i</i>   | 0.4264(4)          | 0        | 0.5158(5) | 1          |
| Lu8  | 4 <i>i</i>   | 0.0421(4)          | 0        | 0.0939(6) | 1          |
| Lu9  | 4 <i>i</i>   | 0.4708(4)          | 0        | 0.2262(6) | 1          |
| Lu10 | 4 <i>i</i>   | 0.2370(4)          | 0        | 0.1469(6) | 1          |
| Pd1  | 4 <i>i</i>   | 0.1474 (6)         | 0        | 0.0310(8) | 1          |
| Pd2  | 4 <i>i</i>   | 0.3638(5)          | 0        | 0.1664(9) | 1          |
| Pd3  | 4 <i>i</i>   | 0.1908(7)          | 0        | 0.2998(9) | 1          |
| Pd4  | 4 <i>i</i>   | 0.5739(6)          | 0        | 0.3071(9) | 1          |
| Pd5  | 4 <i>i</i>   | 0.3859(6)          | 0        | 0.3428(9) | 1          |
| Pd6  | 4 <i>i</i>   | 0.2309(6)          | 0        | 0.573(1)  | 1          |
| Pd7  | 4 <i>i</i>   | 0.0595(5)          | 0        | 0.4893(9) | 1          |
| Pd8  | 4 <i>i</i>   | 0.5490(6)          | 0        | 0.0896(9) | 1          |
| Pd9  | 4 <i>i</i>   | 0.0357(7)          | 0        | 0.778(1)  | 1          |
| Pd10 | 4 <i>i</i>   | 0.7347(7)          | 0        | 0.1443(8) | 1          |
| Pd11 | 4 <i>e</i>   | 1/4                | 1/4      | 0         | 1          |
| Pd12 | 8 <i>j</i>   | 0.2966(3)          | 0.244(2) | 0.2751(5) | 1          |
| Pd13 | 8 <i>j</i>   | 0.1284(3)          | 0.230(2) | 0.1799(4) | 1          |
| Pd14 | 8 <i>j</i>   | 0.1639(3)          | 0.245(2) | 0.4516(4) | 1          |
| Pd15 | 8 <i>j</i>   | 0.4436(3)          | 0.245(3) | 0.0634(4) | 1          |
| Pd16 | 8 <i>j</i>   | 0.4874(3)          | 0.238(2) | 0.3847(4) | 1          |

97.9(4) % of Lu<sub>10</sub>Pd<sub>21</sub>, 2.1(1) % of Lu<sub>3</sub>Pd<sub>5</sub>

Lu<sub>10</sub>Pd<sub>21</sub>:  $a = 24.0474(2)$  Å,  $b = 5.66923(4)$  Å,  $c = 16.1400(1)$  Å,  $\beta = 91.8031(2)^\circ$

Lu<sub>3</sub>Pd<sub>5</sub>:  $a = 9.010(2)$  Å,  $b = 7.004(1)$  Å,  $c = 9.342(1)$  Å

$R_B(\text{Lu}_{10}\text{Pd}_{21}) = 1.3$  %,  $R_F(\text{Lu}_{10}\text{Pd}_{21}) = 1.6$  %,  $B_{\text{over}} = 0.4735(2)$  Å<sup>2</sup>

$R_B(\text{Lu}_3\text{Pd}_5) = 3.3$  %,  $R_F(\text{Lu}_3\text{Pd}_5) = 2.6$  %,  $B_{\text{over}} = 0.800(4)$  Å<sup>2</sup>

$R_{\text{wp}} = 7.0$  %,  $\chi^2 = 1.3$

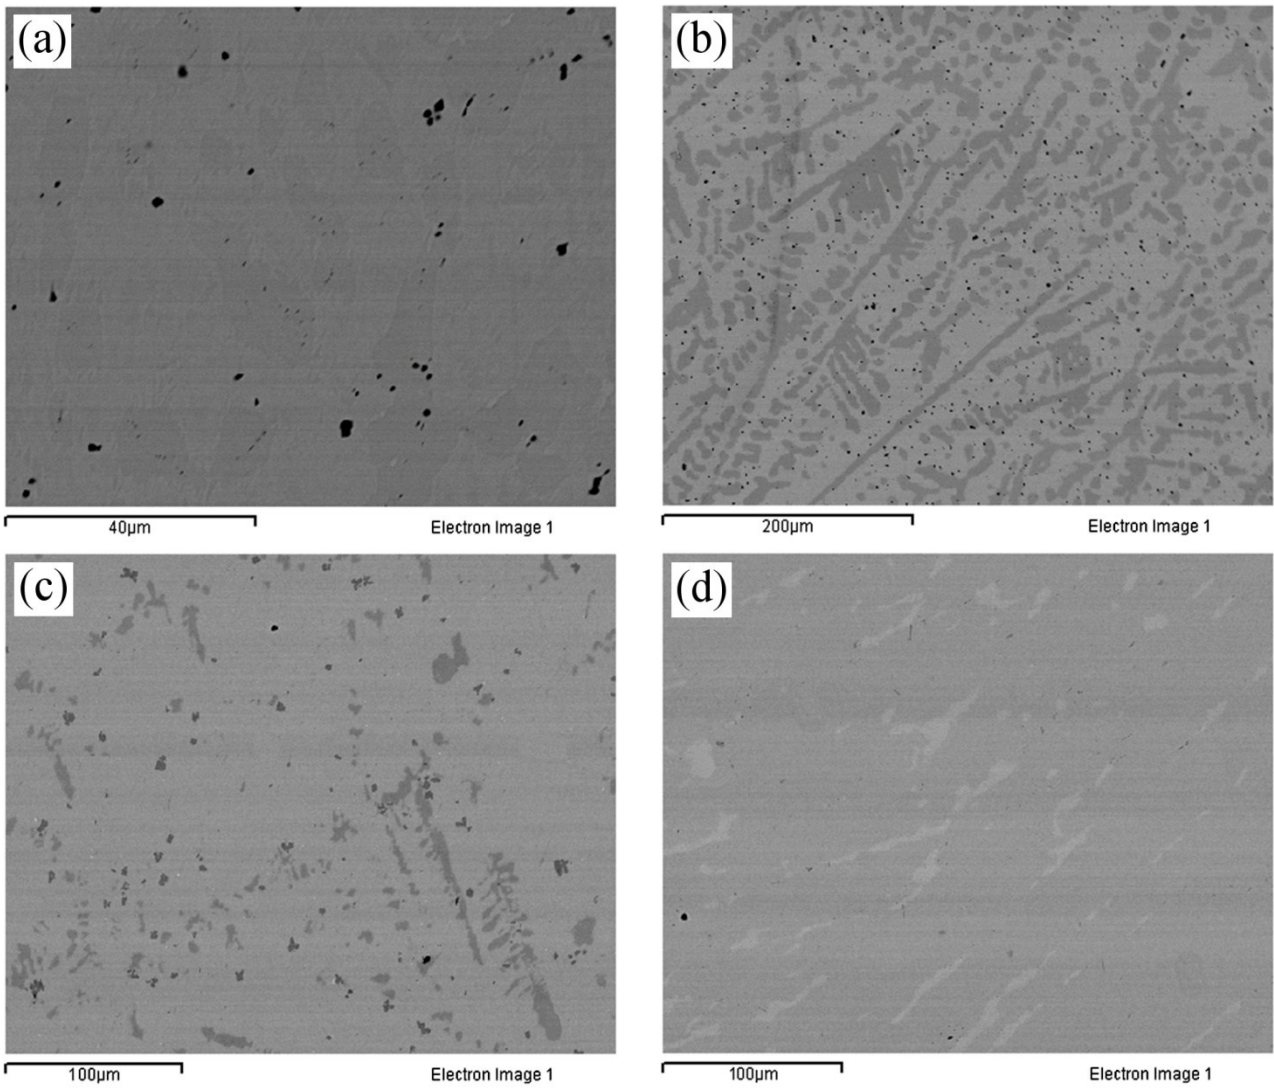

**Fig. S1** SEM images [backscattered electron (BSE) mode] showing the microstructure in selected zones of four samples prepared at the compositions  $\text{Sc}_{35}\text{Pd}_{65}$  (a),  $\text{Pr}_{10}\text{Pd}_{21}$  (b),  $\text{Nd}_{10}\text{Pd}_{21}$  (c) and  $\text{Gd}_{10}\text{Pd}_{21}$  (d). In  $\text{Sc}_{35}\text{Pd}_{65}$  sample the primary slightly darker grains are  $\text{Sc}_3\text{Pd}_5$  and the matrix is a  $\text{ScPd}_2$  phase. In  $\text{Pr}_{10}\text{Pd}_{21}$  sample the darker primary dendritic grains are the  $\text{PrPd}_3$  phase, while the lighter matrix is the new compound  $\text{Pr}_4\text{Pd}_7$ . In  $\text{Nd}_{10}\text{Pd}_{21}$  sample the dark primary grains pertain to the  $\text{NdPd}_3$  phase, while the lighter matrix is the  $\text{Nd}_{10}\text{Pd}_{21}$  phase. In  $\text{Gd}_{10}\text{Pd}_{21}$  sample the lighter grains are of  $\text{Gd}_3\text{Pd}_4$  and the darker matrix is  $\text{Gd}_{10}\text{Pd}_{21}$ .

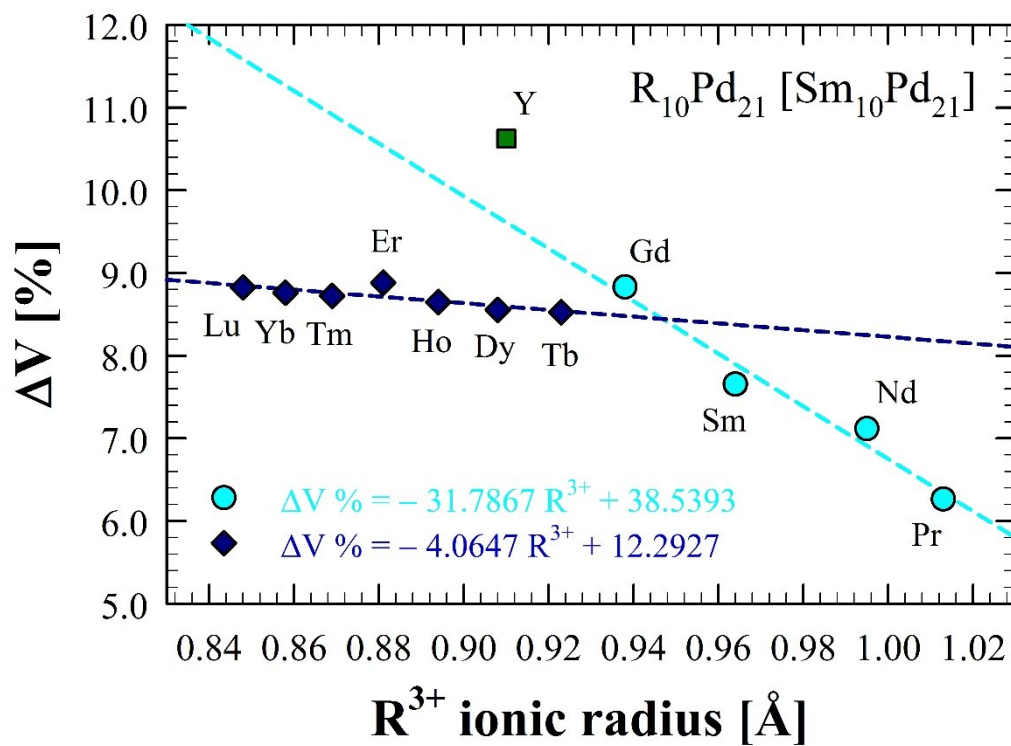

**Fig. S2** Trend of the volume contraction ( $\Delta V$  %) vs. the  $R^{3+}$  ionic radius for the  $R_{10}Pd_{21}$  compounds.

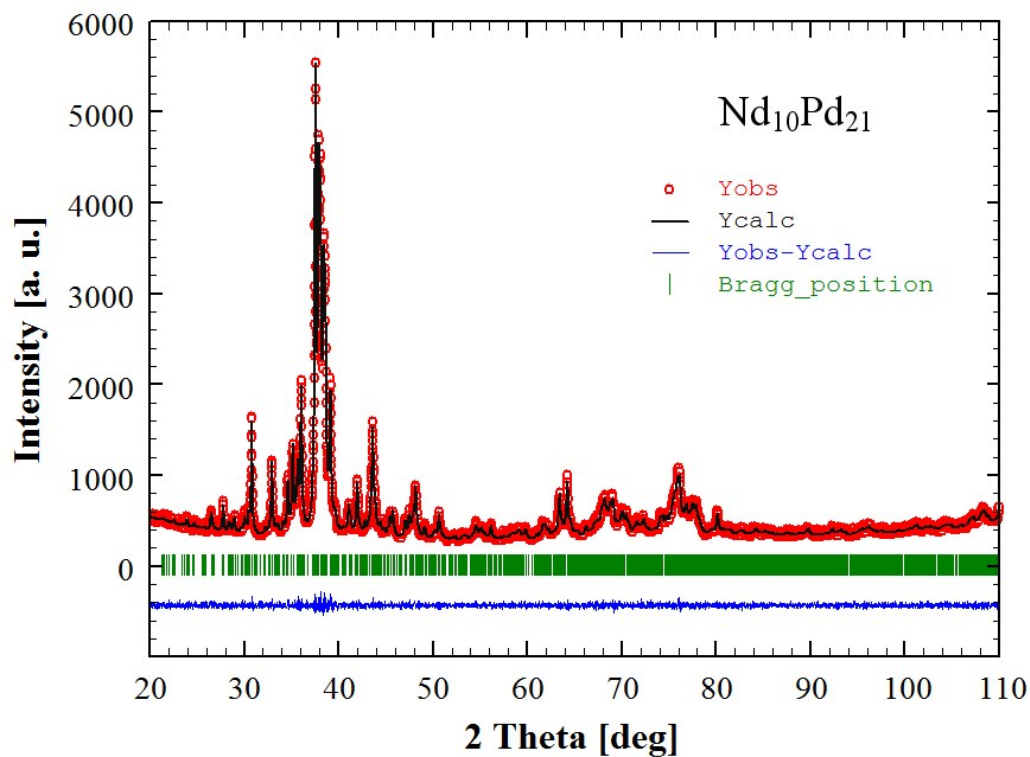

**Fig. S3** Observed X-ray powder pattern (red circle) and Rietveld refinement profile (black line) for the  $\text{Nd}_{10}\text{Pd}_{21}$  sample. The lower profile (blue line) gives the difference between observed and calculated data; the Bragg angle positions are indicated by vertical bars (green).

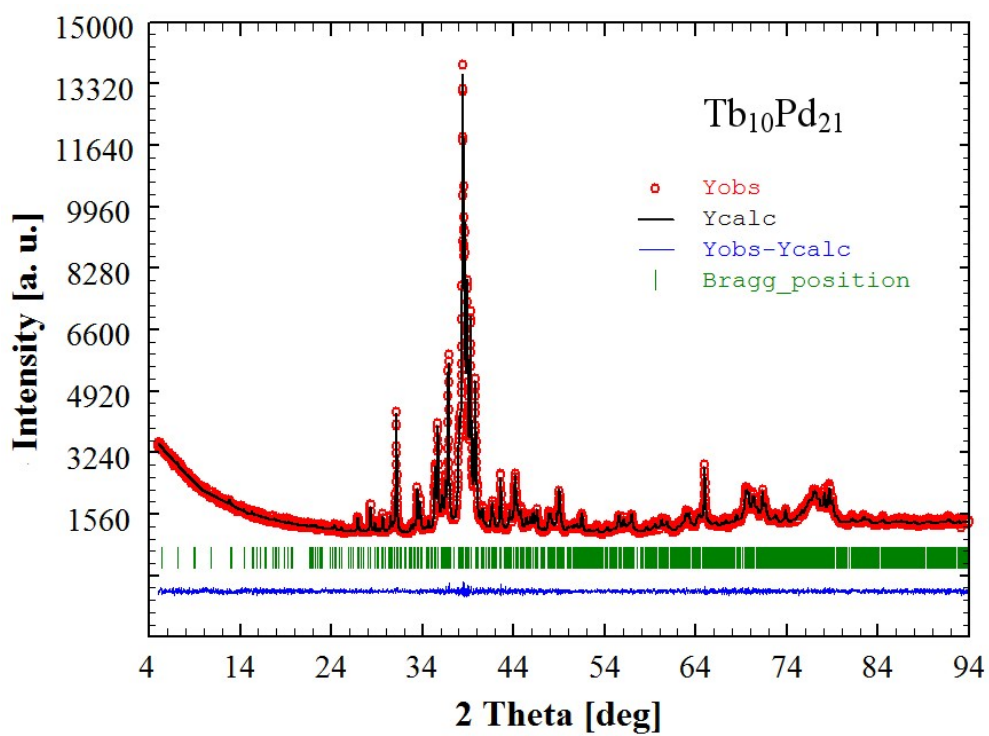

**Fig. S4** Observed X-ray powder pattern (red circle) and Rietveld refinement profile (black line) for the  $Tb_{10}Pd_{21}$  sample. The lower profile (blue line) gives the difference between observed and calculated data; the Bragg angle positions are indicated by vertical bars (green).



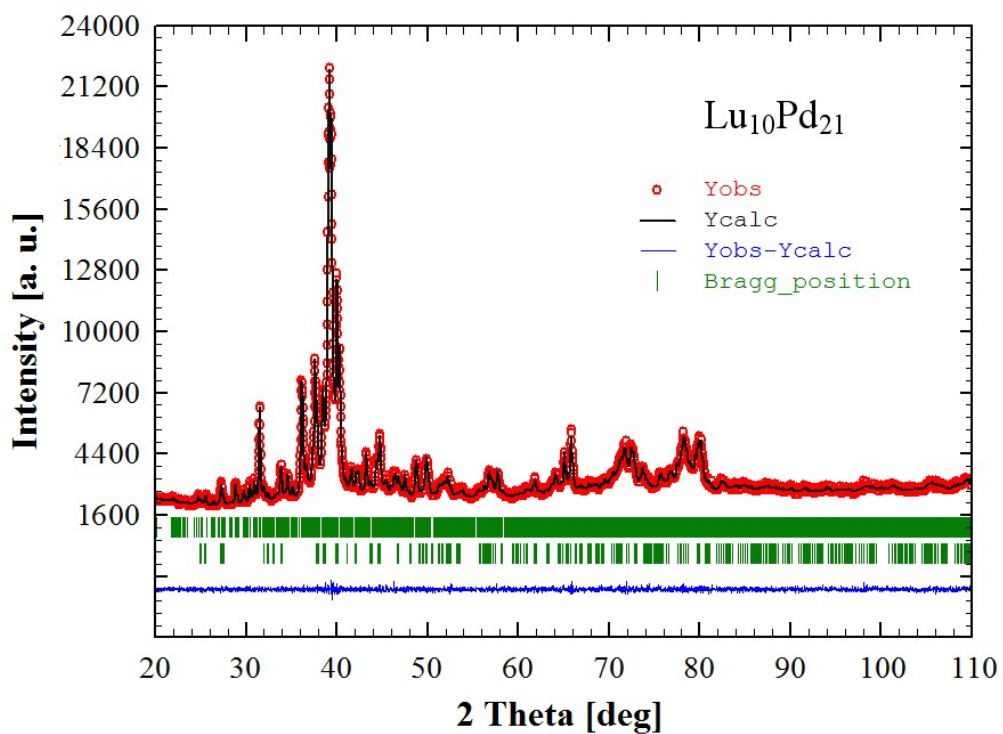

**Fig. S5** Observed X-ray powder pattern (red circle) and Rietveld refinement profile (black line) for the  $\text{Lu}_{10}\text{Pd}_{21}$  sample. The lower profile (blue line) gives the difference between observed and calculated data; the Bragg angle positions of the  $\text{Lu}_{10}\text{Pd}_{21}$  (top) and  $\text{LuPd}_3$  (bottom) phases are indicated by vertical bars (green).
